# Supplementary material
Source: PubMed Central journal article supplement (PMC4365245)
Supplement: JCM.03494-14_zjm999094186so1.pdf [file JCM.03494-14_zjm999094186so1.pdf]

**Supplementary Table 1. Comparison of the percentage of bronchoalveolar lavage fluid neutrophils in 166 non-HIV-infected patients with *Pneumocystis jirovecii* pneumonia who did and did not have concomitant CMV infection.**

|                                        | <b>All<br/>(n = 166)</b> | <b>Mild-to-<br/>moderate<sup>a</sup><br/>(n = 46)</b> | <b>Severe<sup>b</sup><br/>(n = 120)</b> | <b>P</b> |
|----------------------------------------|--------------------------|-------------------------------------------------------|-----------------------------------------|----------|
| <b>With CMV infection (n = 43)</b>     | 25.1 (8.2-47.0)          | 11.0 (3.1-21.3)                                       | 38.5 (11.0-60.5)                        | 0.01     |
| <b>Without CMV infection (n = 123)</b> | 10.9 (4.3-28.7)          | 6.6 (2.5-13.8)                                        | 17.0 (6.7-.34.4)                        | 0.001    |

**NOTE.** Data are shown as median % (interquartile range) of neutrophils. CMV, cytomegalovirus.

<sup>a</sup> 11 patients had concomitant CMV infection.

<sup>b</sup> 32 patients had concomitant CMV infection.

**Supplementary Table 2. Comparison of 30-day and 60-day all-cause mortalities among 166 non-HIV-infected patients with *Pneumocystis jirovecii* pneumonia who did and did not have concomitant CMV infection.**

|                                   | <b>With CMV infection</b> | <b>Without CMV infection</b> |                 |
|-----------------------------------|---------------------------|------------------------------|-----------------|
|                                   | <b>(n = 43)</b>           | <b>(n = 123)</b>             | <b><i>P</i></b> |
| <b>30-day all-cause mortality</b> | 11 (25.6)                 | 25 (20.3)                    | 0.47            |
| <b>60-day all-cause mortality</b> | 15 (34.9)                 | 34 (27.6)                    | 0.37            |

**NOTE.** Data are shown as no. (%) of patients. CMV, cytomegalovirus.
